# Supplementary material for: Individual variation of the masticatory system dominates 3D skull shape in the herbivory-adapted marsupial wombats
Source: PubMed Central journal article supplement (PMC6824091; doi:10.1186/s12983-019-0338-5), 2019-11-01

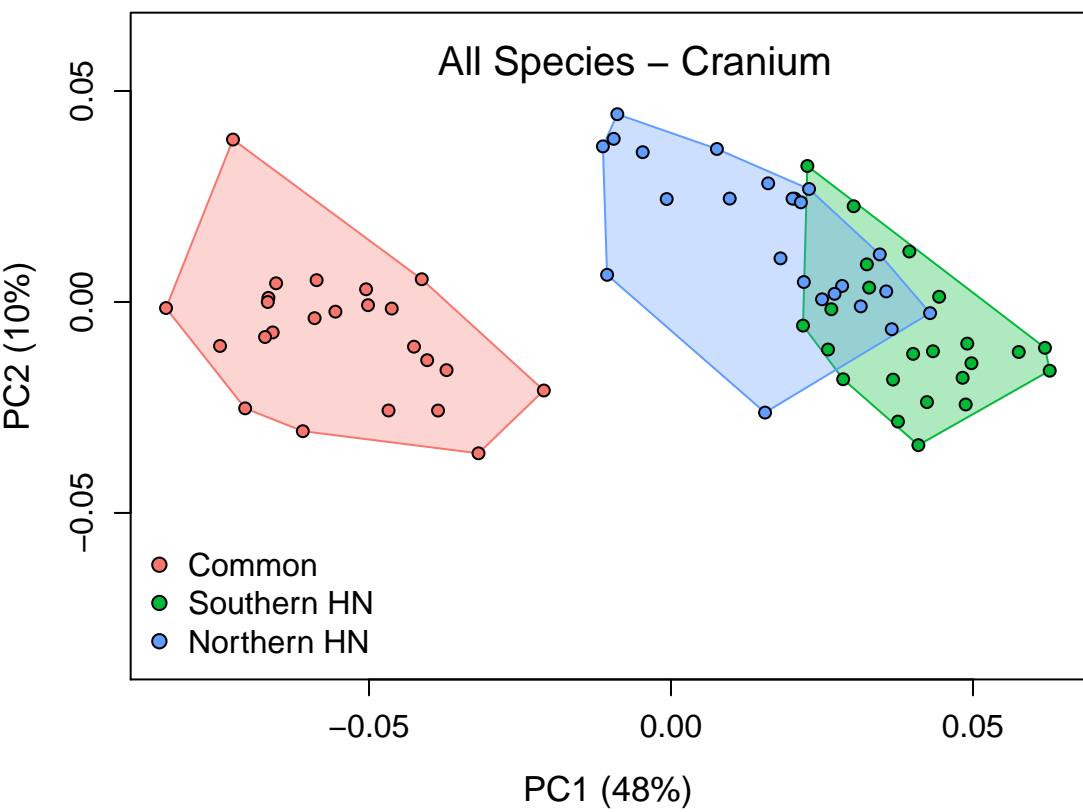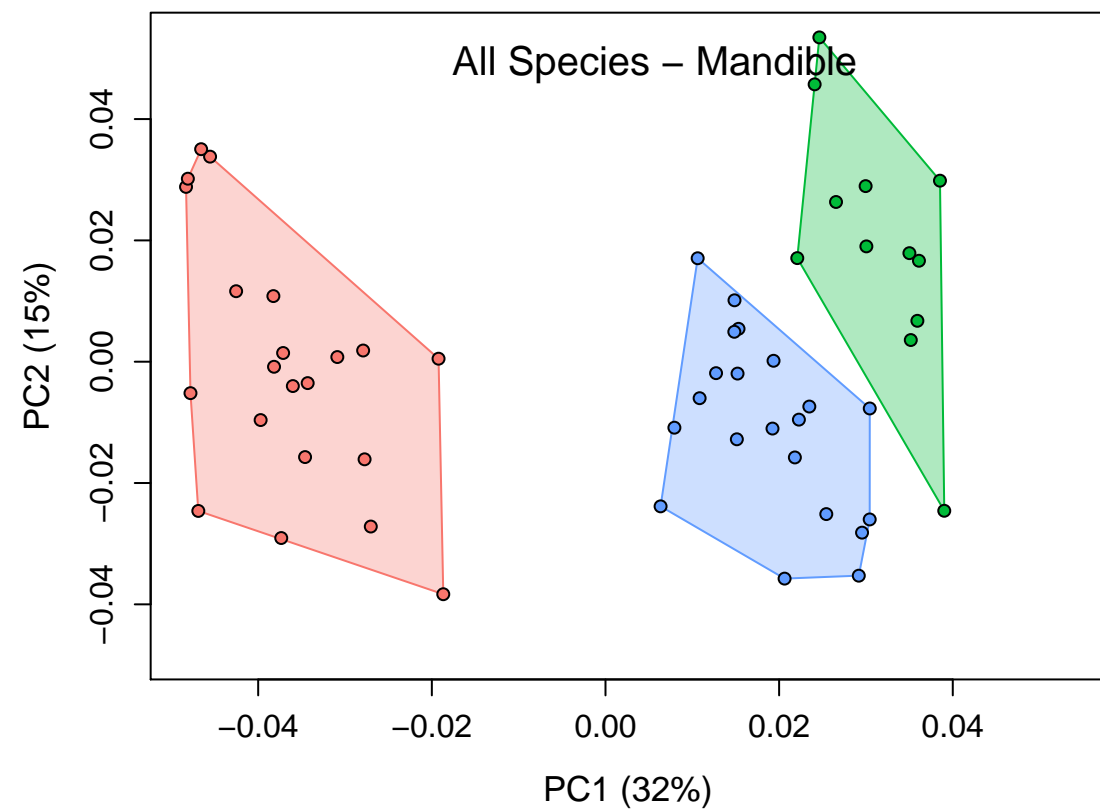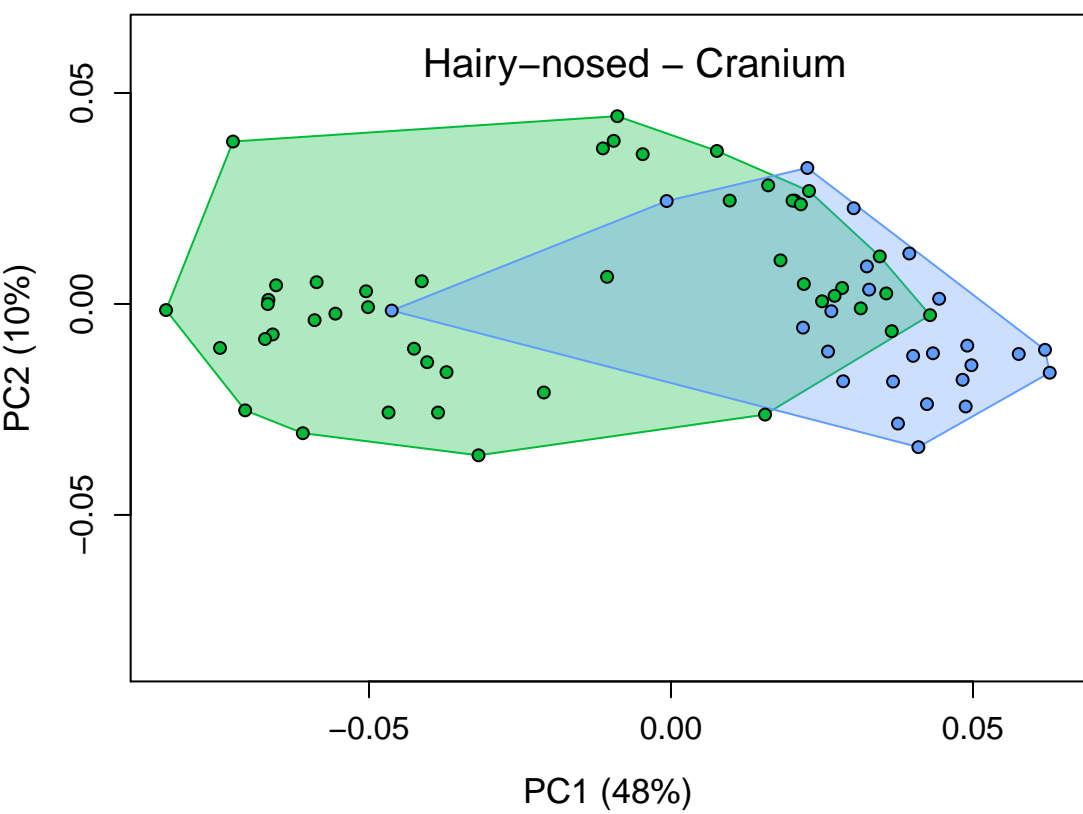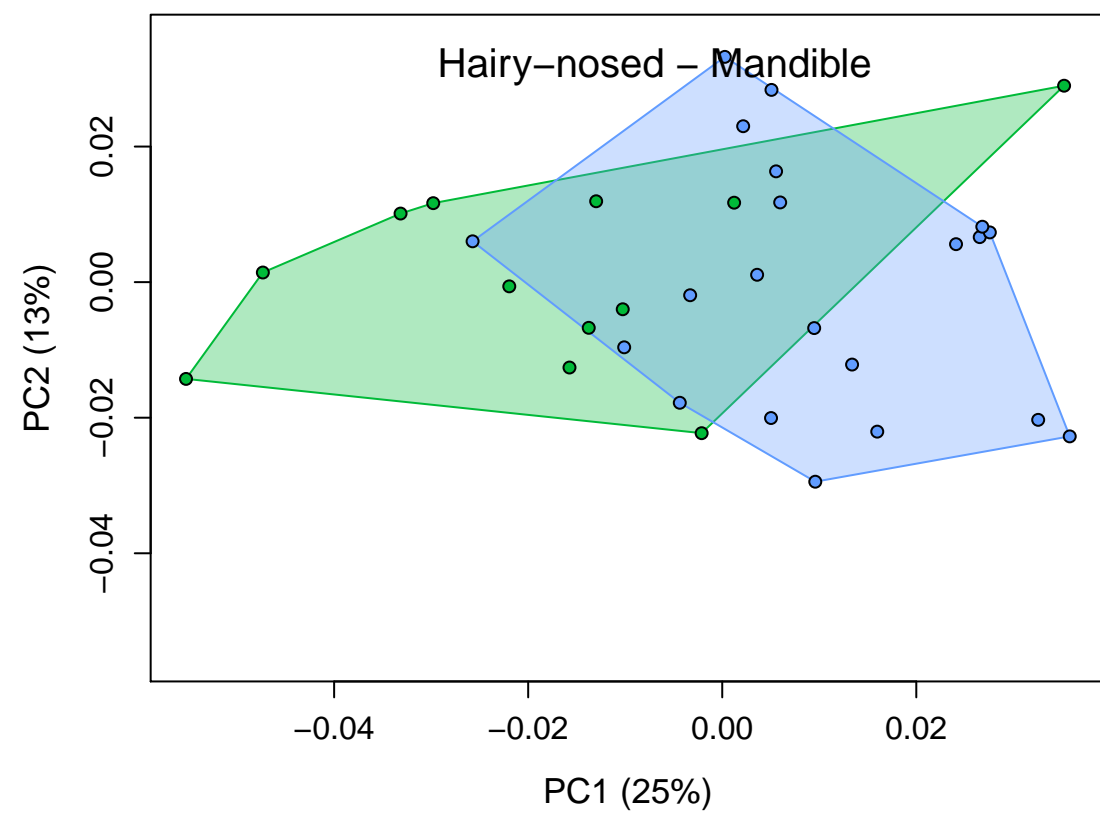

Supplement: 12983_2019_338_MOESM2_ESM.pdf [file 12983_2019_338_MOESM2_ESM.pdf]
