# Supplementary material for: Individual variation of the masticatory system dominates 3D skull shape in the herbivory-adapted marsupial wombats
Source: PubMed Central journal article supplement (PMC6824091; doi:10.1186/s12983-019-0338-5), 2019-11-01
Supplement: 12983_2019_338_MOESM7_ESM.pdf [file 12983_2019_338_MOESM7_ESM.pdf]

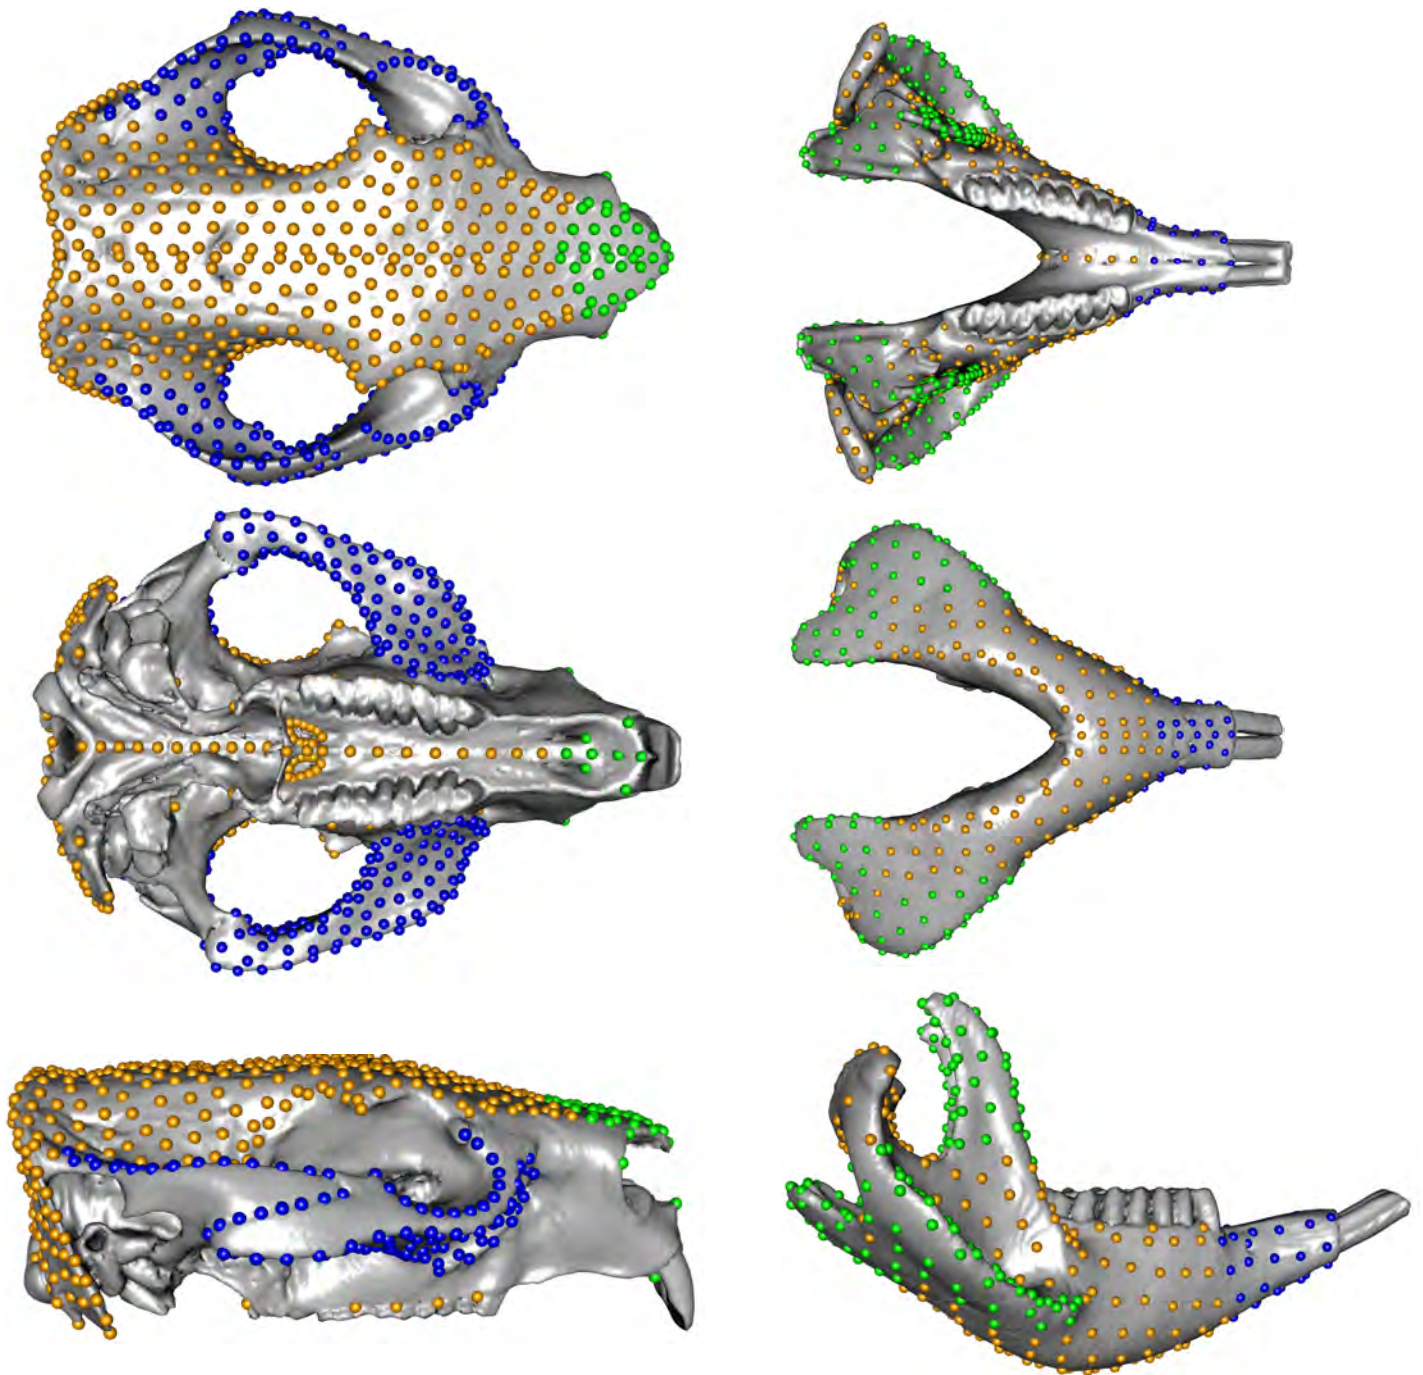

**Additional File 10:** Landmarking partitions for testing landmark magnitudes, plotted on the procrustes mean landmark configuration and cranium/mandible warped to the mean shape. In the cranium (left), blue is the zygomatic arch region with temporal and masseter muscle attachment areas; green is the anterior cranium (“rostrum”), and orange is the remainder of the skull. In the mandible, green are the masticatory muscle insertion sites; blue is the anterior symphyseal area; and orange is the remainder of the mandible. Not to scale.
