# Supplementary material for: Individual variation of the masticatory system dominates 3D skull shape in the herbivory-adapted marsupial wombats
Source: Front Zool. 2019 Nov 1;16:41. doi: 10.1186/s12983-019-0338-5 (PMC6824091; doi:10.1186/s12983-019-0338-5)
Supplement: Supplementary file 4 — Additional file 4. Table of specimen numbers, origin, ethics permits (where applicable) and notes of modifications of 3D geometries. [file 12983_2019_338_MOESM4_ESM.xlsx]

## Sheet: Sheet1
Species	Specimen ID	Mandible	Cranium	Collection/Museum	Location during life	Ethics permission number (non-museum specimens)	Repairs
NHN Wombat	B118	Yes	Yes	Epping National Forest	Epping National Forest	SAFS/181/12/AAEC and live scans under SAFS/412/11/WOMBAT
NHN Wombat	B131	No	Yes	Epping National Forest	Epping National Forest	SAFS/181/12/AAEC and live scans under SAFS/412/11/WOMBAT
NHN Wombat	B135	No	Yes	Epping National Forest	Epping National Forest	SAFS/181/12/AAEC and live scans under SAFS/412/11/WOMBAT
NHN Wombat	B14	Yes	Yes	Epping National Forest	Epping National Forest	SAFS/181/12/AAEC and live scans under SAFS/412/11/WOMBAT	Small hole on side of corpus – filled in
NHN Wombat	B40	No	Yes	Epping National Forest	Epping National Forest	SAFS/181/12/AAEC and live scans under SAFS/412/11/WOMBAT
NHN Wombat	B42	No	Yes	Epping National Forest	Epping National Forest	SAFS/181/12/AAEC and live scans under SAFS/412/11/WOMBAT
NHN Wombat	B79	No	Yes	Epping National Forest	Epping National Forest	SAFS/181/12/AAEC and live scans under SAFS/412/11/WOMBAT
NHN Wombat	B93	No	Yes	Epping National Forest	Epping National Forest	SAFS/181/12/AAEC and live scans under SAFS/412/11/WOMBAT
NHN Wombat	J13143	No	Yes	Queensland Museum	Epping National Forest
NHN Wombat	J13144	No	Yes	Queensland Museum	Epping National Forest
NHN Wombat	J13145	No	Yes	Queensland Museum	Epping National Forest
NHN Wombat	J14051	Yes	Yes	Queensland Museum	Epping National Forest
NHN Wombat	J6239	No	Yes	Queensland Museum	Epping National Forest
NHN Wombat	JM12487	Yes	Yes	Queensland Museum	Epping National Forest
NHN Wombat	JM18942	Yes	Yes	Queensland Museum	Epping National Forest
NHN Wombat	JM19739	Yes	Yes	Queensland Museum	Epping National Forest
NHN Wombat	JM2546	Yes	Yes	Queensland Museum	Epping National Forest
NHN Wombat	JM7474	Yes	Yes	Queensland Museum	Epping National Forest
NHN Wombat	JM7475	No	Yes	Queensland Museum	Epping National Forest		Tip of left mastoid process missing – right mastoid tip mirrored and copied onto left
NHN Wombat	JM8463	No	Yes	Queensland Museum	Epping National Forest
NHN Wombat	JM8466	Yes	Yes	Queensland Museum	Epping National Forest
NHN Wombat	SNC1	Yes	Yes	Epping National Forest	Epping National Forest	Scans of a roadkill donated by the Environmental and Heritage Protection department, donated to UQ Veterinary School Clinic
NHN Wombat	SNC2	Yes	Yes	Epping National Forest	Epping National Forest	Scans of a roadkill donated by the Environmental and Heritage Protection department, donated to UQ Veterinary School Clinic
NHN Wombat	B34	Yes	No	Epping National Forest	Epping National Forest	SAFS/181/12/AAEC and live scans under SAFS/412/11/WOMBAT
NHN Wombat	B71	Yes	No	Epping National Forest	Epping National Forest	SAFS/181/12/AAEC and live scans under SAFS/412/11/WOMBAT
SHN Wombat	J16968	Yes	No	Queensland Museum
SHN Wombat	J17772	Yes	No	Queensland Museum
SHN Wombat	Johnston Kyle (CLVSJR1)	Yes	No	Captive (Mt Larcom) originally from Ceduna, SA (Australian Animals Care and Education)	Captive (Mt Larcom) originally from Ceduna, SA (Australian Animals Care and Education)	South Australian Dept. of Environment and Natural Resources Permit to Destroy Wildlife D27775; UQ animal ethics number SAFS/181/12/AAEC
SHN Wombat	Johnston Holly (CLVSJR5)	Yes	Yes	Captive (Mt Larcom) originally from Ceduna, SA (Australian Animals Care and Education)	Captive (Mt Larcom) originally from Ceduna, SA (Australian Animals Care and Education)	South Australian Dept. of Environment and Natural Resources Permit to Destroy Wildlife D27775; UQ animal ethics number SAFS/181/12/AAEC
SHN Wombat	Johnston Mr Fox (CLVSJR4)	Yes	Yes	Captive (Mt Larcom) originally from Ceduna, SA (Australian Animals Care and Education)	Captive (Mt Larcom) originally from Ceduna, SA (Australian Animals Care and Education)	South Australian Dept. of Environment and Natural Resources Permit to Destroy Wildlife D27775; UQ animal ethics number SAFS/181/12/AAEC
SHN Wombat	M8746	Yes	Yes	South Australian Museum	Roonka Station (SA)
SHN Wombat	M8748	Yes	Yes	South Australian Museum	Roonka Station (SA)
SHN Wombat	M8749	Yes	Yes	South Australian Museum	Haylands (SA)
SHN Wombat	M8752	Yes	Yes	South Australian Museum	Portee Station (SA)
SHN Wombat	M8774	Yes	Yes	South Australian Museum	Yardea Station
SHN Wombat	M8783	No	Yes	South Australian Museum	Nullarbor Station (SA)
SHN Wombat	M8801	Yes	Yes	South Australian Museum	Nullarbor Station (SA)
SHN Wombat	M8807	Yes	Yes	South Australian Museum	Nullarbor Station (SA)
SHN Wombat	M8827	Yes	No	South Australian Museum	Yardea Station (SA)
SHN Wombat	M8867	Yes	Yes	South Australian Museum	Nullarbor Station (SA)
SHN Wombat	M8887	Yes	Yes	South Australian Museum	Portee Station (SA)
SHN Wombat	M8892	Yes	Yes	South Australian Museum	Ceduna (SA)
SHN Wombat	M8951	Yes	Yes	South Australian Museum	Ceduna (SA)
SHN Wombat	M8952	Yes	Yes	South Australian Museum	Ceduna (SA)
SHN Wombat	NR1326	Yes	Yes	UNE Zoology Collection	NA
SHN Wombat	NR1348	Yes	Yes	UNE Zoology Collection	NA
SHN Wombat	NR1349	Yes	Yes	UNE Zoology Collection	NA
SHN Wombat	SHNW_F_SNC10	Yes	No	Ceduna (SA)	Ceduna (SA)	South Australian Dept. of Environment and Natural Resources Permit to Destroy Wildlife D27775; UQ animal ethics number SAFS/181/12/AAEC
SHN Wombat	SHNW_F_SNC9	Yes	Yes	Ceduna (SA)	Ceduna (SA)	South Australian Dept. of Environment and Natural Resources Permit to Destroy Wildlife D27775; UQ animal ethics number SAFS/181/12/AAEC
SHN Wombat	SHNW_M_SNC11	Yes	Yes	Ceduna (SA)	Ceduna (SA)	South Australian Dept. of Environment and Natural Resources Permit to Destroy Wildlife D27775; UQ animal ethics number SAFS/181/12/AAEC
SHN Wombat	SHNW_M_SNC12	No	Yes	Ceduna (SA)	Ceduna (SA)	South Australian Dept. of Environment and Natural Resources Permit to Destroy Wildlife D27775; UQ animal ethics number SAFS/181/12/AAEC
Common Wombat	J11665	No	Yes	Queensland Museum	Wyerba (QLD)
Common Wombat	J5422	No	Yes	Queensland Museum	Stanthorpe (QLD)
Common Wombat	J6203A	No	Yes	Queensland Museum	Mittagong (QLD)
Common Wombat	J6203B	No	Yes	Queensland Museum	Mittagong (QLD)
Common Wombat	JM5397	Yes	No	Queensland Museum	Mt Kosciouszko (NSW)
Common Wombat	M11	Yes	Yes	South Australian Museum	Flinders Island (TAS)
Common Wombat	M11968	Yes	Yes	South Australian Museum	Bondo Stat Forest (NSW)
Common Wombat	M11973	Yes	Yes	South Australian Museum	Greens Beach (TAS)
Common Wombat	M11976	Yes	Yes	South Australian Museum	Greens Beach (TAS)
Common Wombat	M11977	Yes	Yes	South Australian Museum	Greens Beach (TAS)
Common Wombat	M1937	Yes	Yes	South Australian Museum	Robe (SA)
Common Wombat	M1942	Yes	Yes	South Australian Museum	Central Highlands (TAS)
Common Wombat	M1943	Yes	Yes	South Australian Museum	Central Highlands (TAS)
Common Wombat	M21375	Yes	Yes	South Australian Museum	Mount Ruskin (SA)
Common Wombat	M22220	Yes	Yes	South Australian Museum	Salt Creek (SA)
Common Wombat	M22233	No	Yes	South Australian Museum	Southend (SA)
Common Wombat	M29	Yes	No	South Australian Museum	Mount Schanck (SA)
Common Wombat	M3721	Yes	Yes	South Australian Museum	Joanna (SA)
Common Wombat	M68	Yes	Yes	South Australian Museum	Mount Schanck (SA)
Common Wombat	NR0654	Yes	No	UNE Zoology Collection	NA
Common Wombat	NR0718	Yes	Yes	South Australian Museum	NA		Tip of left coronoid missing – right coronoid tip mirrored and copied onto left
Common Wombat	NR1328	Yes	Yes	UNE Zoology Collection	NA
Common Wombat	NR1351	Yes	Yes	UNE Zoology Collection	NA		Small hole on dorsal surface – filled in
Common Wombat	NR1352	Yes	Yes	UNE Zoology Collection	NA
Common Wombat	NR1353	Yes	Yes	UNE Zoology Collection	NA
Common Wombat	NR1609	Yes	Yes	UNE Zoology Collection	NA
Common Wombat	Vombatus Ursinus Dental	No	Yes	Queensland Museum	NA

## Sheet: Sheet2
Mandible	Cranium	Match
B70	B118	Missing
B21	B131	Missing
B14	B135	B14
B135	B14	B135
B15	B40	Missing
B34	B42	B34
B43	B79	Missing
B42	B93	B42
B89	J13143	Missing
B143	J13144	Missing
B34	J13145	B34
B93	J14051	B93
B93	J6239	B93
Betw. B208/198	JM12487	Missing
B118	JM18942	B118
B131	JM19739	B131
B226	JM2546	Missing
B343	JM7474	Missing
B221	JM7475	Missing
No location	JM8463	Missing
B48	JM8466	Missing
B210	SNC1	Missing
B79	SNC2	B79
B92	B34	Missing
B40	B71	B40
B236	B236	B236
No location
No location
No location
No location
No location
